# Supplementary material for: Studies toward Morphological Changes of Silver/Carbon Fiber Composites and Their Optimization for High‐Performance Electrochemical Electrodes
Source: Hindawi journal article supplement (doi:10.1155/2024/8851270), 2024-01-01
Supplement: f1 [file 8851270.f1.pdf]

**Supplementary Material for**  
**Study of morphological change of silver/carbon fiber composites and**  
**optimization for high-performance electrochemical electrodes**

*Taehan Yeo<sup>†</sup>, Kyungmin Kim<sup>†</sup>, Jaeho Lee, Byeongseok Seo, Seonghyun Park, Wonjoon Choi\**

School of Mechanical Engineering, Korea University, Seoul, Republic of Korea, 02841

<sup>†</sup> These authors contributed equally to this study.

\*Author to whom correspondence should be addressed.

E-mail: [wojchoi@korea.ac.kr](mailto:wojchoi@korea.ac.kr), Phone: +82 2 3290 5951, Fax: +82 2 926 9290

Keywords: silver sphere; carbon fiber sheet; nanosphere synthesis; electrochemical electrode;  
supercapacitor; electrothermal process

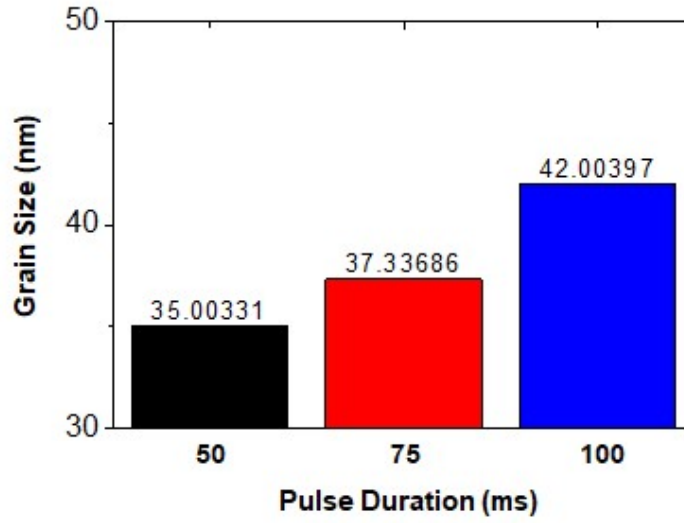

**Figure S1. Variation of the average grain size of Ag particles.** The average grain size was analyzed using Debye Scherrer theory with (111) plane peak, as given in the XRD spectra (**Figure 3 (f)**).

Debye Scherrer equation is expressed as follows in equation (1),

$$D = \frac{0.9\lambda}{\beta \cos\theta} \quad (1)$$

where  $\lambda$  is the wavelength of the X-ray,  $\beta$  is the full width at half maximum (FWHM), and  $\theta$  is the Bragg angle.

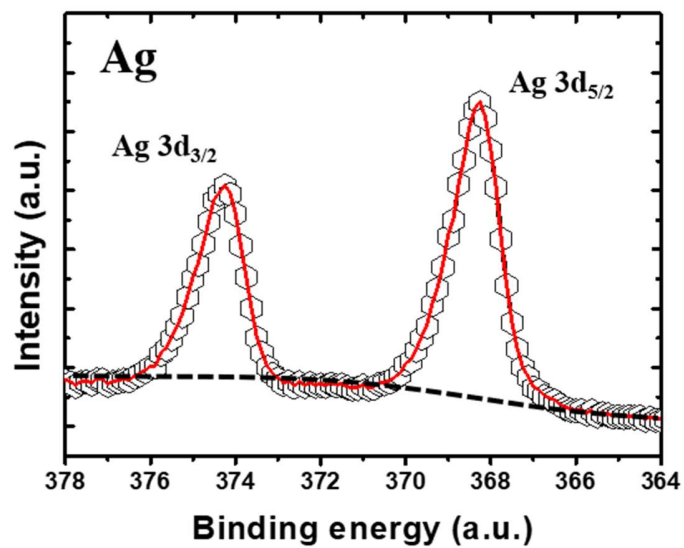

**Figure S2. X-ray photoelectron spectroscopy (XPS) spectra of Ag-CF hybrid composites.**

Narrow scan of Ag 3d<sub>3/2</sub>, Ag 3d<sub>5/2</sub> peaks, obtained from Ag-CF hybrid composites fabricated by ETP under a 1500 W power, 75 ms pulse duration, and 3 times of the pulse.

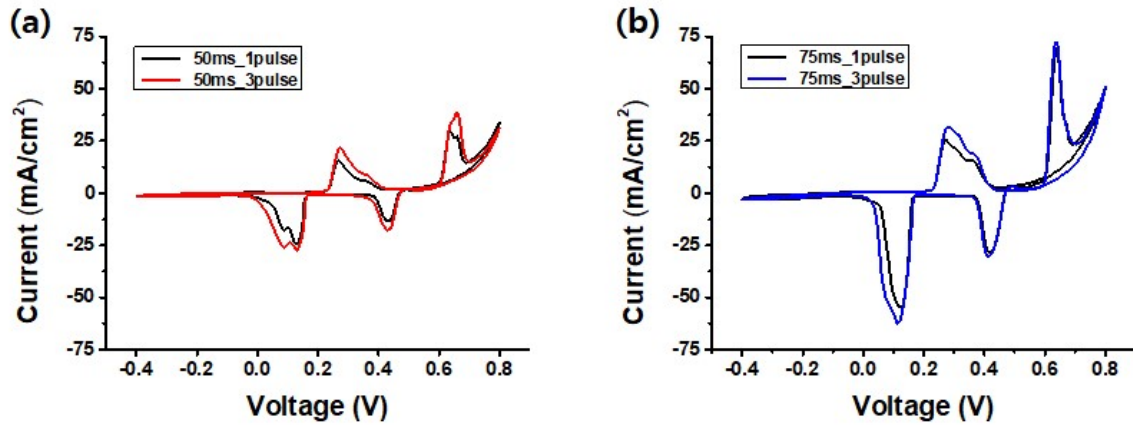

**Figure S3. Cyclic voltammetry (CV) curves of Ag/CFs electrodes obtained by applying different numbers of pulses with 50 and 75 ms duration at scan rate of 20 mV/s.**

Specific areal capacitance was calculated using a following equation:

$$C = \frac{\int IV \, dV}{2\mu mW}$$

where C is the specific capacitance, I is the current in the CV test, V is the Potential in the CV test,  $\mu$  is the scan rate, m is the area of the sample and W is the voltage window.

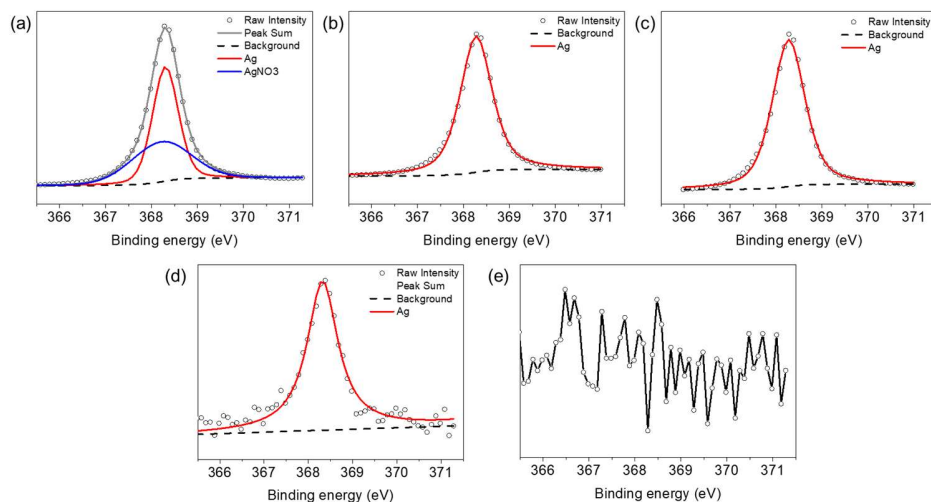

**Figure S4. X-ray photoelectron spectroscopy (XPS) spectra at Ag 3d 5/2 of Ag-CF hybrid composites made by single ETP pulse with different duration of (a) 25 ms, (b) 50 ms, (c) 75 ms, (d) 100 ms and (e) 125 ms.**

Except 25 ms and 125 ms, all raw data was fitted well with only Ag. In case of 25 ms, the data was fitted with the peak intensity of Ag at 368.3 eV and AgNO<sub>3</sub> at 368.2 eV[1, 2]

1 **Table S1. Comparison of supercapacitance performance utilizing Ag-carbon based hybrid**  
2 **materials as active materials.**

| active materials          | Electrolyte                                         | Silver morphology           | Measurement condition | Capacitance             | CDC   | Retention (%) | Ref.      |
|---------------------------|-----------------------------------------------------|-----------------------------|-----------------------|-------------------------|-------|---------------|-----------|
| Ag/carbon fiber           | KOH 5 M                                             | sphere                      | 5 mV/s                | 13 F/cm <sup>2</sup>    | 1000  | 98            | this work |
| PANI/Ag <sub>2</sub> O-Ag | Na <sub>2</sub> S <sub>2</sub> O <sub>3</sub> 0.5 M | porous sphere               | 0.4 A/g               | 160 F/g                 | 1000  | -             | [3]       |
| Ag/activated carbon       | KOH 6 M                                             | irregularly shaped spheroid | 5 mV/s                | 3.288 F/cm <sup>2</sup> | 10000 | 130           | [4]       |
| Ag/porous carbon          | KOH 6 M                                             | irregularly shaped spheroid | 0.5 A/g               | 323.8 F/g               | 4000  | 93.2          | [5]       |
| Ag/carbon sphere          | KOH 3 M                                             | agglomerated sphere         | 1 mA/cm <sup>2</sup>  | 0.421 F/cm <sup>2</sup> | 2000  | 96            | [6]       |
| Ag/rGO/cotton             | NaOH 0.5 M                                          | irregularly shaped spheroid | 5 mV/s                | 426 F/g                 | 1000  | 126           | [7]       |

3 Abbreviation: CDC, charge-discharge cycle number

4

## References

1. V. K. Kaushik, "XPS core level spectra and Auger parameters for some silver compounds," *Journal of Electron Spectroscopy and Related Phenomena*, vol. 56, no. 3, pp. 273-277, 1991.
2. G. Schön, "High resolution Auger electron spectroscopy of metallic copper," *Journal of Electron Spectroscopy and Related Phenomena*, vol. 1, no. 4, pp. 377-387, 1972.
3. A. Atta, M. M. Abdelhamied, D. Essam, M. Shaban, A. H. Alshammari and M. Rabia, "Structural and physical properties of polyaniline/silver oxide/silver nanocomposite electrode for supercapacitor applications," *International Journal of Energy Research*, vol. 46, no. 5, pp. 6702-6710, 2022.
4. N. Keawploy, R. Venkatkarthick, P. Wangyao, X. Zhang, R. Liu and J. Qin, "Eco-Friendly Conductive Cotton-Based Textile Electrodes Using Silver- and Carbon-Coated Fabrics for Advanced Flexible Supercapacitors," *Energy & Fuels*, vol. 34, no. 7, pp. 8977-8986, 2020.
5. R. Wang, X. Li, Z. Nie, Q. Jing, Y. Zhao, H. Song and H. Wang, "Ag nanoparticles-decorated hierarchical porous carbon from cornstalk for high-performance supercapacitor," *Journal of Energy Storage*, vol. 51, pp. 104364, 2022.
6. Z. Norouzi, S. H. Mahmoudi Najafi and S. A. Mozaffari, "Silver-loaded carbon sphere-in-rod 3D nano-architectures as electrode material for supercapacitors," *Diamond and Related Materials*, vol. 121, pp. 108734, 2022.
7. Z. Karami, M. Youssefi, K. Raeissi and M. Zhiani, "An efficient textile-based electrode utilizing silver nanoparticles/reduced graphene oxide/cotton fabric composite for high-performance wearable supercapacitors," *Electrochimica Acta*, vol. 368, pp. 137647, 2021.
